# Supplementary material for: Models of buoyancy-driven dykes using continuum plasticity or fracture mechanics: a comparison
Source: Copernicus journal article supplement (doi:10.5194/gmd-18-6219-2025), 2025-09-23
Supplement: Supplementary file [file gmd-18-6219-2025-supplement-title-page.pdf › gmd-18-6219-2025-supplement-title-page.pdf]

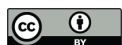

*Supplement of*

## **Models of buoyancy-driven dykes using continuum plasticity or fracture mechanics: a comparison**

**Yuan Li et al.**

*Correspondence to:* Yuan Li ([yuan.li@earth.ox.ac.uk](mailto:yuan.li@earth.ox.ac.uk))

- [gmd-18-6219-2025-supplement-title-page.pdf](#)
- [porosity.mp4](#)

The copyright of individual parts of the supplement might differ from the article licence.
